# Supplementary material for: Metformin improves the angiogenic potential of human CD34+ cells co-incident with downregulating CXCL10 and TIMP1 gene expression and increasing VEGFA under hyperglycemia and hypoxia within a therapeutic window for myocardial infarction
Source: Springer Nature journal article supplement (doi:10.1186/s12933-016-0344-2), 2016-02-09
Supplement: MOESM1 [file 9760420]

## Online Supplemental Materials

### **Metformin Improves the Angiogenic Potential of Human CD34<sup>+</sup> Cells Co-incident with Downregulating *CXCL10* and *TIMP1* Gene Expression and Increasing VEGFA under Hyperglycemia and Hypoxia within a Therapeutic Window for Myocardial Infarction**

Sherin Bakhshab<sup>1,3,4</sup>, Fahad W. Ahmed<sup>1,2</sup>, Hans-Juergen Schulten<sup>4</sup>, Ayat Bashir<sup>1</sup>, Sajjad Karim<sup>4</sup>, Abdulrahman L. Al-Malki<sup>3</sup>, Mamdooh A. Gari<sup>4</sup>, Adel M. Abuzenadah<sup>4</sup>, Adeel G. Chaudhary<sup>4</sup>, Mohammed H. Alqahtani<sup>4</sup>, Sahira Lary<sup>3</sup>, Farid Ahmed<sup>4</sup>, Jolanta U. Weaver<sup>1,2\*</sup>

<sup>1</sup>*Institute of Cellular Medicine, Newcastle University, Newcastle Upon Tyne, UK*

<sup>2</sup>*Queen Elizabeth Hospital, Gateshead, Newcastle Upon Tyne, UK*

<sup>3</sup>*Biochemistry Department, King Abdulaziz University, Jeddah, Saudi Arabia*

<sup>4</sup>*Centre of Excellence in Genomic Medicine Research, King Abdulaziz University, Jeddah, Saudi Arabia*

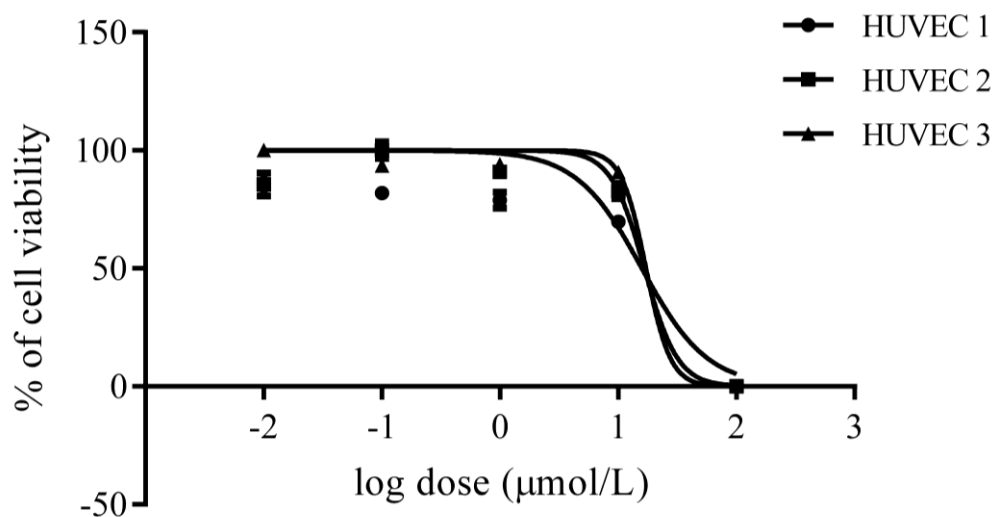

**Supplementary Figure 1: Cell viability assay on HUVEC treated with sunitinib.** HUVEC ( $10^4$  cells/ well) in 96 well plate were treated with increasing concentrations of sunitinib (0.01, 0.1, 1.0, 10, and 100  $\mu\text{mol/L}$ ) in quadruplicates. After 6 hours CellTiter-Blue reagent (Promega) was added to each well, and the cells were incubated for 2 hours prior to recording fluorescence (560/590 nm). Results are presented as mean  $\pm$  SEM. The mean of IC50 was calculated as 16.6  $\mu\text{mol/L}$ .

**Supplementary Table 1: Effect of 3 hours hypoxia on biological functions involved in CD34<sup>+</sup> cells.**

| Functions Annotation                   | p-Value  | Predicted Activation State | Activation z-score | Molecules                                                                                                                                                    | Number of Molecules |
|----------------------------------------|----------|----------------------------|--------------------|--------------------------------------------------------------------------------------------------------------------------------------------------------------|---------------------|
| Inflammatory Response                  | 1.09E-11 | Decreased                  | -2.725             | ↓AQP9, ↓C3, ↓CCL2, ↓CCL20, ↓CCL5, ↓CCR7, ↓CD14, ↓CXCL5, ↓FOS, ↓IL-1 $\alpha$ , ↓IL-6, ↓IL-8, ↓mir-21, ↓PLA2G7, ↓PPBP, ↓RGS1, ↑S100A8, ↓TNFAIP6, ↓UTS2        | 19                  |
| Cellular Movement                      | 2.82E-11 | Decreased                  | -2.274             | ↓AQP9, ↓C3, ↓CCL2, ↓CCL20, ↓CCL5, ↓CCR7, ↓CXCL5, ↓IL-1 $\alpha$ , ↓IL-8, ↓PLA2G7, ↓PPBP, ↓RGS1, ↑S100A8, ↓UTS2                                               | 14                  |
| Cell-To-Cell Signaling and Interaction | 4.69E-11 | Decreased                  | -3.289             | ↓C3, ↓CCL2, ↓CCL5, ↓CCR7, ↓CD14, ↓CLEC1B, ↓CTSL1, ↓CXCL5, ↓DUSP1, ↓FOS, ↓IL-1 $\alpha$ , ↓IL-6, ↓IL-8, ↓KRT18, ↓MET, ↓mir-21, ↓MS4A1, ↓NCOR2, ↑PPBP, ↑S100A8 | 20                  |
| Cellular Growth and Proliferation      | 3.92E-08 | Decreased                  | -2.195             | ↓CCL2, ↓CCL5, ↓DUSP1, ↓FOS, ↓IL-1 $\alpha$ , ↓IL-6, ↓IL-8, ↓MET, ↓mir-21, ↓TFPI2, ↑TOB2, ↓UTS2                                                               | 12                  |

Gene list was generated by using IPA software. The activation z-score was used in the calculation of significant changes in gene expression in different samples and conditions. It is calculated from the dataset and indicates activation or inhibition of the biological function as (+) indicates activation while (-) indicates inhibition. The arrow  $\uparrow$  indicates gene is upregulated and  $\downarrow$  indicates gene is downregulated. Key: *AQP9*: aquaporin 9; *C3*: complement component 3; *CCL2*: chemokine (C-C motif) ligand 2; *CCR7*: chemokine (C-C motif) receptor 7; *CD14*: CD14 molecule; *CLEC1B*: C-type lectin domain family 1, member B; *CTSL1*: cathepsin L1; *CXCL5*: chemokine (C-X-C motif) ligand 5; *DUSP1*: dual specificity phosphatase 1; *FOS*: FBJ murine osteosarcoma viral oncogene homolog; *IL-1 $\alpha$* : interleukin 1 alpha; *KRT18*: keratin 18; *MET*: met proto-oncogene (hepatocyte growth factor receptor); *mir-21*: microRNA 21; *MS4A1*: membrane-spanning 4-domains, subfamily A, member 1; *NCOR2*: nuclear receptor corepressor 2; *PLA2G7*: phospholipase A2, group VII (platelet-activating factor acetylhydrolase, plasma); *PPBP*: pro-platelet basic protein (chemokine (C-X-C motif) ligand 7); *RGS1*: regulator of G-protein signaling 1; *S100A8*: S100 calcium binding protein A8; *TFPI2*: tissue factor pathway inhibitor 2; *TNFAIP6*: tumour necrosis factor, alpha-induced protein 6; *TOB2*: transducer of ERBB2, 2; *UTS2*: urotensin 2.

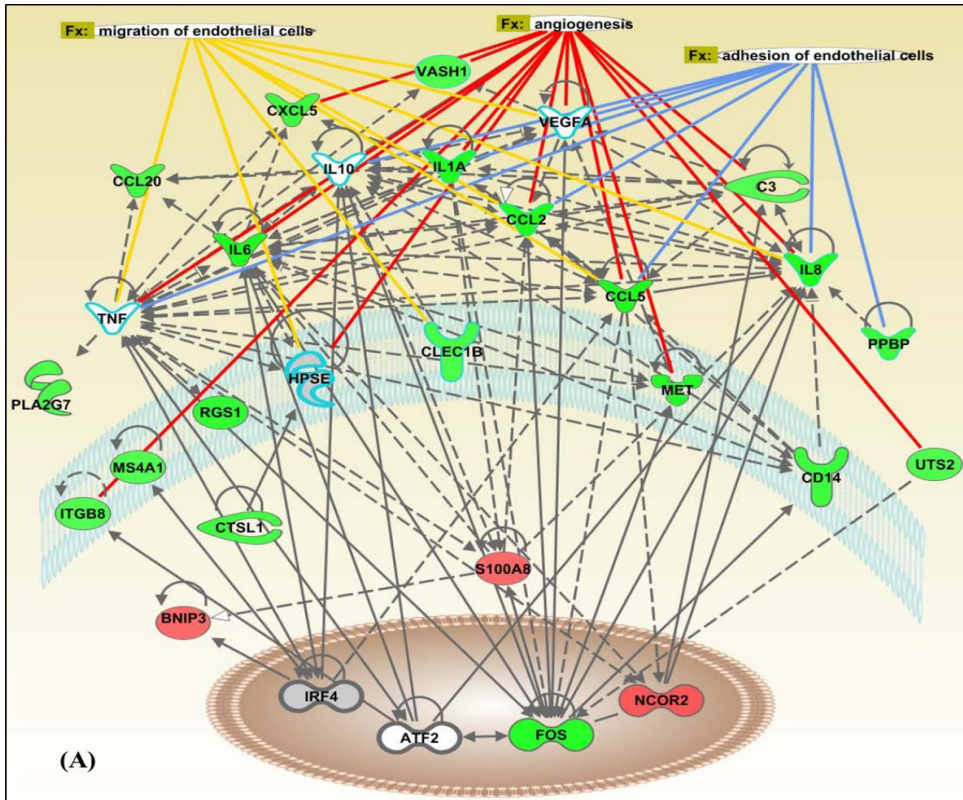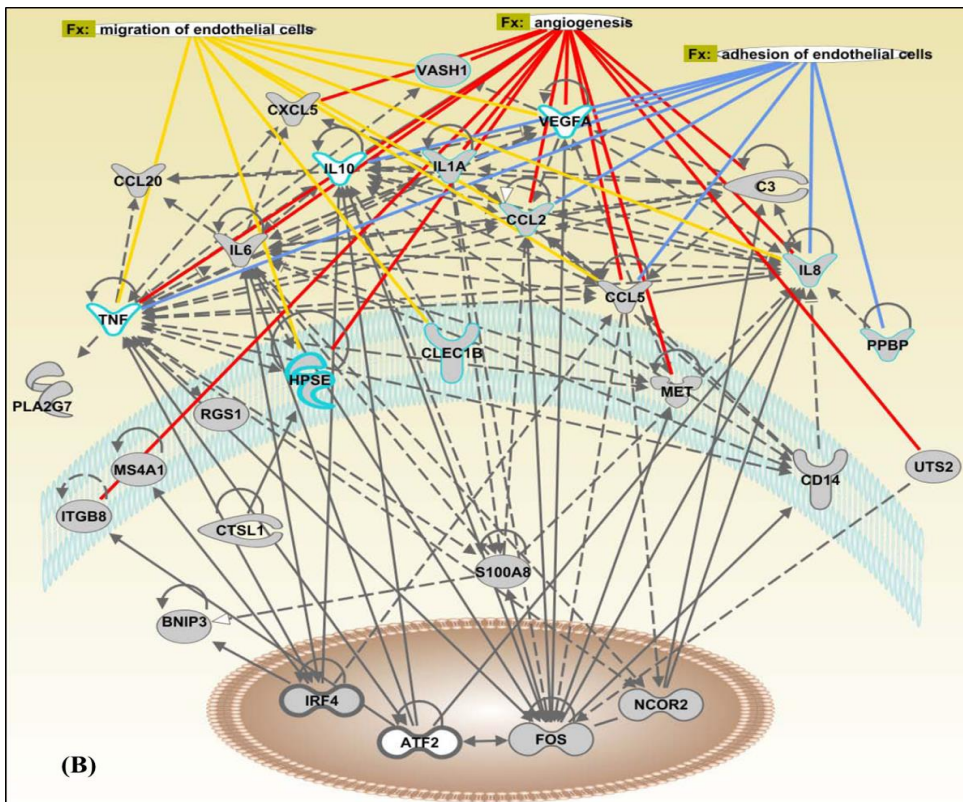

| Gene Name                                       | Gene symbol | FC    | Family                  |
|-------------------------------------------------|-------------|-------|-------------------------|
| Activating transcription factor 2               | ATF2        |       | transcription regulator |
| BCL2/adenovirus E1B 19kDa interacting protein 3 | BNIP3       | 1.51  | other                   |
| Complement component 3                          | C3          | -1.51 | peptidase               |

|                                                                                  |        |       |                         |
|----------------------------------------------------------------------------------|--------|-------|-------------------------|
| Chemokine (C-C motif) ligand 2                                                   | CCL2   | -2.25 | cytokine                |
| Chemokine (C-C motif) ligand 20                                                  | CCL20  | -1.64 | cytokine                |
| Chemokine (C-C motif) ligand 5                                                   | CCL5   | -2.29 | cytokine                |
| CD14 molecule                                                                    | CD14   | -1.71 | transmembrane receptor  |
| C-type lectin domain family 1, member B                                          | CLEC1B | -1.60 | transmembrane receptor  |
| Cathepsin L1                                                                     | CTSL1  | -1.67 | peptidase               |
| Chemokine (C-X-C motif) ligand 5                                                 | CXCL5  | -1.68 | cytokine                |
| FBJ murine osteosarcoma viral oncogene homolog                                   | FOS    | -1.89 | transcription regulator |
| Heparanase                                                                       | HPSE   | -1.44 | enzyme                  |
| Interleukin 10                                                                   |        |       | cytokine                |
| Interleukin 1, alpha                                                             | IL1A   | -4.67 | cytokine                |
| Interleukin 6 (interferon, beta 2)                                               | IL6    | -2.50 | cytokine                |
| Interleukin 8                                                                    | IL8    | -2.43 | cytokine                |
| Interferon regulatory factor 4                                                   | IRF4   | -1.14 | transcription regulator |
| Integrin, beta 8                                                                 | ITGB8  | -1.52 | other                   |
| Met proto-oncogene (hepatocyte growth factor receptor)                           | MET    | -1.91 | kinase                  |
| Membrane-spanning 4-domains, subfamily A, member 1                               | MS4A1  | -1.50 | other                   |
| Nuclear receptor corepressor 2                                                   | NCOR2  | 1.70  | transcription regulator |
| Phospholipase A2, group VII (platelet-activating factor acetylhydrolase, plasma) | PLA2G7 | -1.59 | enzyme                  |
| Pro-platelet basic protein (chemokine (C-X-C motif) ligand 7)                    | PPBP   | -1.74 | cytokine                |
| Regulator of G-protein signaling 1                                               | RGS1   | -1.81 | other                   |
| S100 calcium binding protein A8                                                  | S100A8 | 1.52  | other                   |
| Tumour necrosis factor                                                           |        |       | cytokine                |
| Urotensin 2                                                                      | UTS2   | -1.53 | other                   |
| Vasohibin 1                                                                      | VASH1  | -1.55 | other                   |
| Vascular endothelial growth factor A                                             | VEGFA  |       | growth factor           |

**Supplementary Figure 2: Effect of metformin on euglycaemia-hypoxia treated CD34<sup>+</sup>**

**cells.** CD34<sup>+</sup> cells were treated with euglycaemia and hypoxia for 3 hours in the presence or absence of metformin for 24 hours. A set of differentially expressed genes was generated by comparing (A) euglycaemia and hypoxia versus euglycaemia or (B) euglycaemia and metformin exposed to hypoxia versus euglycaemia and hypoxia without metformin. The comprehensive network was created by IPA software. Green shades indicate downregulated, red shades indicate upregulated genes and grey unchanged genes.

**Supplementary Table 2: Top 30 differentially expressed genes in CD34<sup>+</sup> cells induced by hyperglycaemia compared to control.**

| Gene Name                                                        | Gene Symbol | <i>p</i> -value | FC    |
|------------------------------------------------------------------|-------------|-----------------|-------|
| Lysine (K)-specific demethylase 5D                               | KDM5D       | 2.32E-11        | -3.56 |
| Selectin P (granule membrane protein 140kDa, antigen CD62)       | SELP        | 3.27E-09        | -5.01 |
| Gamma-aminobutyric acid (GABA) A receptor, epsilon               | GABRE       | 3.31E-09        | -2.76 |
| Integrin, beta 3 (platelet glycoprotein IIIa, antigen CD61)      | ITGB3       | 3.71E-09        | -6.70 |
| Chromosome Y open reading frame 15B                              | CYorf15B    | 3.74E-09        | -5.06 |
| Coagulation factor XIII, A1 polypeptide                          | F13A1       | 4.77E-09        | -3.50 |
| Polycystic kidney and hepatic disease 1 (autosomal recessive)-1  | PKHD1L1     | 6.50E-09        | -6.43 |
| KIAA0087                                                         | KIAA0087    | 1.40E-08        | 2.48  |
| Chromosome Y open reading frame 15A                              | CYorf15A    | 2.26E-08        | -4.54 |
| DEAD (Asp-Glu-Ala-Asp) box polypeptide 3, Y-linked               | DDX3Y       | 2.29E-08        | -4.16 |
| Ubiquitously transcribed tetratricopeptide repeat gene, Y-linked | UTY         | 2.94E-08        | -3.89 |
| Heparanase                                                       | HPSE        | 3.39E-08        | -2.81 |
| Nexilin (F actin binding protein)                                | NEXN        | 9.83E-08        | -3.21 |
| Major histocompatibility complex, class II, DQ beta 1            | HLA-DQB1    | 1.03E-07        | -7.01 |
| Ubiquitin specific peptidase 9, Y-linked                         | USP9Y       | 1.19E-07        | -3.83 |
| Major histocompatibility complex, class II, DQ beta 1            | HLA-DQB1    | 1.44E-07        | -8.74 |
| Galectin-related protein                                         | HSPC159     | 1.55E-07        | -5.74 |
| Epithelial cell adhesion molecule                                | EPCAM       | 2.04E-07        | -2.96 |
| Zinc finger protein, Y-linked                                    | ZFY         | 2.10E-07        | -3.23 |
| Dynamin 3                                                        | DNM3        | 2.35E-07        | -2.06 |
| Eukaryotic translation initiation factor 1A, Y-linked            | EIF1AY      | 3.09E-07        | -4.85 |
| Phosphodiesterase 3A, cGMP-inhibited                             | PDE3A       | 3.98E-07        | -2.52 |
| Olfactory receptor, family 3, subfamily A, member 2              | OR3A2       | 4.25E-07        | 2.31  |
| Snail homolog 2 (Drosophila)                                     | SNAI2       | 4.51E-07        | 2.16  |
| Glycoprotein Ib (platelet), alpha polypeptide                    | GP1BA       | 6.25E-07        | -2.70 |
| Testis-specific transcript, Y-linked 10 (non-protein coding)     | TTY10       | 6.58E-07        | -2.58 |
| Latent transforming growth factor beta binding protein 1         | LTBP1       | 6.69E-07        | -2.94 |
| C-type lectin domain family 1, member B                          | CLEC1B      | 1.06E-06        | -4.25 |
| Potassium channel, subfamily K, member 17                        | KCNK17      | 1.17E-06        | 2.55  |
| Immunoglobulin lambda joining 3                                  | IGLJ3       | 1.76E-06        | 2.31  |

The gene list was created by importing Affymetrix .CEL files to Partek Genomic Suite version 6.6. The data were RMA normalized. Differentially expressed gene list was generated using one-way ANOVA, FDR-unadjusted *p*-value < 0.05 with a fold change cutoff of 1.5 was applied.

**Supplementary Table 3: Top biological functions involved in CD34<sup>+</sup> cells cultured in hyperglycaemia.**

| Functions                              | p-Value  | Predicted Activation State | Activation z-score | Molecules                                                                                                                                                                                                                                                                                                                                                                                                                                                    | Number of Molecules |
|----------------------------------------|----------|----------------------------|--------------------|--------------------------------------------------------------------------------------------------------------------------------------------------------------------------------------------------------------------------------------------------------------------------------------------------------------------------------------------------------------------------------------------------------------------------------------------------------------|---------------------|
| Cell-To-Cell Signaling and Interaction | 1.80E-17 | Decreased                  | -2.27              | ↓AVPR1A, ↓BDNF, ↑BLNK, ↑BTLA, ↓CCL2, ↑CCR7, ↓CD14, ↓CD226, ↓CD24, ↓CD36, ↑CD3E, ↑CD79A, ↓CLEC1B, ↓CTSL1, ↓CXCL2, ↓FCER1A, ↓GP1BA, ↓GP5, ↓GP6, ↑HCK, ↓HLA-DQA1, ↓HLA-DQB1, ↓HPSE, ↑IGHM, ↑IGK, ↓IL-18, ↓IL-1 $\alpha$ , ↓IL-6, ↓IL-8, ↑IRF4, ↓ITGA2B, ↓ITGB3, ↓VEGFR-2, ↓LTBP1, ↓MET, ↑MS4A1, ↑NCOR2, ↑NCR1, ↓NTS, ↓PF4, ↑PLD2, ↓PPBP, ↓PRKCA, ↓PROS1, ↓PTGS2, ↓PTPRJ, ↑S100A12, ↑S100A8, ↓SELP, ↑SH2D1A, ↑TCL1A, ↓THBS1, ↓TLR4, ↑TLR7, ↑TNFRSF17, ↓VIP, ↓VWF | 57                  |
| Cellular Growth and Proliferation      | 1.21E-12 | Decreased                  | -1.40              | ↑BLNK, ↑BTLA, ↓CCL2, ↑CCR7, ↓CD14, ↓CD226, ↓CD24, ↓CD36, ↑CD3E, ↑CD79A, ↓CLEC1B, ↓CXCL2, ↓FYB, ↑HCK, ↓HLA-DQA1, ↓HLA-DQB1, ↑IGHM, ↑IGKC, ↑IKZF3, ↓IL-18, ↓IL-1 $\alpha$ , ↓IL-5RA, ↓IL-6, ↓IL-8, ↓INHBA, ↑IRF4, ↓ITGA2B, ↓ITGB3, ↓LTBP1, ↑LY9, ↑MS4A1, ↓PDE5A, ↓PF4, ↓PTGS2, ↓PTPRJ, ↓RUNX1T1, ↑SH2D1A, ↑SNAI2, ↑TCL1A, ↓THBS1, ↓TLR4, ↑TLR7, ↑TNFRSF17, ↓VIP                                                                                                | 44                  |
| Inflammatory Response                  | 1.59E-12 | Decreased                  | -1.18              | ↑BLNK, ↑BTLA, ↓CCL2, ↑CCR7, ↓CD14, ↓CD226, ↑CD3E, ↑CD79A, ↓CLEC1B, ↓CTSL1, ↑HCK, ↓HLA-DQA1, ↓HLA-DQB1, ↓HPSE, ↑IGHM, ↓IL-18, ↓IL-1 $\alpha$ , ↓IL-6, ↓IL-8, ↑IRF4, ↓LTBP1, ↓MET, ↑NCOR2, ↑NCR1, ↓PF4, ↑PLD2, ↓PRKCA, ↓PROS1, ↓PTGS2, ↓PTPRJ, ↑S100A12, ↑S100A8, ↑SH2D1A, ↑TCL1A, ↓THBS1, ↓TLR4, ↑TLR7, ↑TNFRSF17, ↓VIP                                                                                                                                       | 39                  |
| Cellular Movement                      | 2.60E-11 | Decreased                  | -3.31              | ↓AQP9, ↓BDNF, ↑BTLA, ↓CCL2, ↑CCR7, ↓CD14, ↓CD226, ↑CD36, ↓CD3E, ↓CLEC1B, ↓CTTN, ↓CXCL2, F13A1, ↓FCER1A, ↓FYB, ↓GP1BA, ↓GP6, ↑HCK, ↓IL-18, ↓IL-1 $\alpha$ , ↓IL-6, ↓IL-8, ↓INHBA, ↓ITGA2B, ↓ITGB3, ↓VEGFR-2, ↓PF4, ↓PLA2G7, ↓PPBP, ↓PRKCA, ↓PTGS2, ↓PTPRJ, ↓S100A10, ↑S100A12, ↑S100A8, ↓SELP, ↑SH2D1A, ↓THBS1, ↓TLR4, ↑TLR7, ↑TNFSF8, ↓UTS2, ↓VIP, ↓VWF                                                                                                      | 44                  |

The affected biological functions were generated by analysis of the gene list using IPA software. The activation z-score was used in the calculation of significant changes in gene expression in different samples and conditions. It is calculated from the dataset and indicates activation or inhibition of the biological function as (+) indicates activation while (-) indicates inhibition. The arrow  $\uparrow$  indicates gene is upregulated and  $\downarrow$  indicates gene is downregulated. Key: AQP9: aquaporin 9; AVPR1A: arginine vasopressin receptor 1A; BDNF: brain-derived neurotrophic factor; BLNK: B-cell linker; BTLA: B and T lymphocyte associated; CCL2: chemokine (C-C motif) ligand 2; CCR7: chemokine (C-C motif) receptor 7; CD14: CD14 molecule; CD226: CD226 molecule; CD3E: CD3e molecule, epsilon (CD3-TCR complex); CD79A: CD79a molecule, immunoglobulin-associated alpha; CLEC1B: C-type lectin domain family 1, member B; CTSL1: cathepsin L1; CXCL2: chemokine (C-X-C motif)

ligand 2; *FI3A1*: coagulation factor XIII, A1 polypeptide; *FCERIA*: Fc fragment of IgE, high affinity I, receptor for; alpha polypeptide; *FYB*: FYN binding protein; *GPIBA*: glycoprotein Ib (platelet), alpha polypeptide; *GP5*: glycoprotein V (platelet); *HCK*: hemopoietic cell kinase; *HLA-DQA1*: major histocompatibility complex, class II, DQ alpha 1; *HPSE*: heparanase; *IGHM*: immunoglobulin heavy constant mu; *IGK*: immunoglobulin kappa locus; *IKZF3*: IKAROS family zinc finger 3 (Aiolos); *IL-18*: interleukin 18; *INHBA*: inhibin, beta A; *IRF4*: interferon regulatory factor 4; *ITGA2B*: integrin, alpha 2b (platelet glycoprotein IIb of IIb/IIIa complex, antigen CD41); *ITGB3*: integrin, beta 3 (platelet glycoprotein IIIa, antigen CD61); *LTBPI*: latent transforming growth factor beta binding protein 1; *LY9*: lymphocyte antigen 9; *MET*: met proto-oncogene (hepatocyte growth factor receptor); *MS4A1*: membrane-spanning 4-domains, subfamily A, member 1; *NCOR2*: nuclear receptor corepressor 2; *NCRI*: natural cytotoxicity triggering receptor 1; *NTS*: neurotensin; *PDE5A*: phosphodiesterase 5A, cGMP-specific; *PF4*: platelet factor 4; *PLA2G7*: phospholipase A2, group VII (platelet-activating factor acetylhydrolase, plasma); *PLD2*: phospholipase D2; *PPBP*: pro-platelet basic protein (chemokine (C-X-C motif) ligand 7); *PRKCA*: protein kinase C, alpha; *PROS1*: protein S (alpha); *PTGS2*: prostaglandin-endoperoxide synthase 2 (prostaglandin G/H synthase and cyclooxygenase); *PTPRJ*: protein tyrosine phosphatase, receptor type, J; *RUNX1T1*: runt-related transcription factor 1; translocated to, 1 (cyclin D-related); *S100A12*: S100 calcium binding protein A12; *SELP*: selectin P (granule membrane protein 140kDa, antigen CD62); *SH2D1A*: SH2 domain containing 1A; *SNAI2*: snail homolog 2 (Drosophila); *TCL1A*: T-cell leukemia/lymphoma 1A; *THBS1*: thrombospondin 1; *TLR4*: toll-like receptor 4; *TNFRSF17*: tumour necrosis factor receptor superfamily, member 17; *UTS2*: urotensin 2; *VEGFR-2*: vascular endothelial growth factor receptor-2; *VIP*: vasoactive intestinal peptide; *VWF*: von Willebrand factor.

#### Supplementary Table 4: Top canonical pathways involved in CD34<sup>+</sup> cells cultured in hyperglycaemia.

| Ingenuity Canonical Pathways  | P-value | Molecules                                                                |
|-------------------------------|---------|--------------------------------------------------------------------------|
| Atherosclerosis Signaling     | 3.2E-07 | ↓IL8, ↓IL1A, ↓IL18, ↓CCL2, ↓SELP, ↓CD36, ↓ALOX12, ↑S100A8, ↓IL6, ↓PLA2G7 |
| T Helper Cell Differentiation | 6.6E-04 | ↓IL18, ↓HLA-DQA1, ↑HLA-DOB, ↓HLA-DQB1, ↓IL6, ↓HLA-DRB5                   |
| IL-6 Signaling                | 2.1E-03 | ↓IL8, ↓IL1A, ↓IL18, ↓CD14, ↓IL6, ↓TNFAIP6                                |

The arrow ↑ indicates gene is upregulated and ↓ indicates gene is downregulated. For genes key refer to Supplementary Table 3 legend.



**Supplementary Table 5: Top 30 differentially expressed genes in CD34<sup>+</sup> cells induced by hyperglycaemia and treated with metformin compared to hyperglycaemia.**

| Gene Name                                                         | Gene Symbol | <i>p</i> -value | FC    |
|-------------------------------------------------------------------|-------------|-----------------|-------|
| Small nucleolar RNA, H/ACA box 70C (retrotransposed)              | SNORA70C    | 1.41E-03        | 1.95  |
| HFM1, ATP-dependent DNA helicase homolog ( <i>S. cerevisiae</i> ) | HFM1        | 1.73E-03        | -1.62 |
| Eyes shut homolog ( <i>Drosophila</i> )                           | EYS         | 2.10E-03        | -1.53 |
| Small Cajal body-specific RNA 16                                  | SCARNA16    | 2.13E-03        | -1.51 |
| Ribosomal protein S6 pseudogene 6                                 | RPS6P6      | 2.91E-03        | 1.79  |
| Small nucleolar RNA, H/ACA box 71C                                | SNORA71C    | 2.99E-03        | -1.59 |
| Transmembrane protein 45A                                         | TMEM45A     | 3.00E-03        | -1.52 |
| Ubiquitin specific peptidase 18                                   | USP18       | 3.10E-03        | 1.63  |
| Small nucleolar RNA, C/D box 94                                   | SNORD94     | 3.94E-03        | -1.51 |
| Microfibrillar associated protein 5                               | MFAP5       | 5.58E-03        | -1.54 |
| Small nucleolar RNA, H/ACA box 68                                 | SNORA68     | 5.69E-03        | -1.60 |
| CD177 molecule                                                    | CD177       | 5.72E-03        | -1.86 |
| Nuclear transport factor 2-like                                   | LOC128322   | 6.53E-03        | 1.58  |
| NADH dehydrogenase (ubiquinone) 1 alpha subcomplex, 4, 9kDa       | NDUFA4      | 6.77E-03        | -1.53 |
| Family with sequence similarity 72, member D                      | FAM72D      | 7.17E-03        | -1.64 |
| SPANX family, member E                                            | SPANXE      | 7.19E-03        | 1.58  |
| Small Cajal body-specific RNA 6                                   | SCARNA6     | 8.70E-03        | -1.89 |
| Heat shock protein 90kDa alpha (cytosolic), class A member 6      | HSP90AA6P   | 9.46E-03        | 2.34  |
| Chromosome 4 open reading frame 11                                | C4orf11     | 9.60E-03        | 1.58  |
| Epithelial cell adhesion molecule                                 | EPCAM       | 9.93E-03        | -2.06 |
| Golgin A6 family, member A                                        | GOLGA6A     | 9.94E-03        | 1.89  |
| Small nucleolar RNA, C/D box 15A                                  | SNORD15A    | 1.04E-02        | -1.52 |
| Coiled-coil domain containing 122                                 | CCDC122     | 1.22E-02        | -1.51 |
| Small Cajal body-specific RNA 1                                   | SCARNA1     | 1.24E-02        | -1.86 |
| Small nucleolar RNA, H/ACA box 21                                 | SNORA21     | 1.32E-02        | -1.57 |
| Golgin A6 family, member A                                        | GOLGA6A     | 1.38E-02        | 1.72  |
| Small nucleolar RNA, H/ACA box 52                                 | SNORA52     | 1.40E-02        | -1.64 |
| Glutathione S-transferase alpha 3                                 | GSTA3       | 1.42E-02        | 1.64  |
| Small nucleolar RNA, H/ACA box 23                                 | SNORA23     | 1.48E-02        | -1.62 |
| Small nucleolar RNA, H/ACA box 54                                 | SNORA54     | 1.55E-02        | -1.74 |

Refer to legend in Supplementary Table 2.

**Supplementary Table 6: Effect of metformin on canonical pathways involved in CD34<sup>+</sup> cells cultured in combined hyperglycaemia-hypoxia for 3 hours.**

| Canonical Pathways                 | P-value | Molecules                                                         |
|------------------------------------|---------|-------------------------------------------------------------------|
| Mitochondrial Dysfunction          | 2.0E-03 | ↓COX6B1, ↓ATP5D, ↓COX8A, ↑MAPK9, ↓NDUFA3, ↓CYB5A, ↓COX5B, ↓MT-ND2 |
| Triacylglycerol Biosynthesis       | 7.1E-03 | ↓GPAM, ↑AGPAT9, ↑ELOVL6                                           |
| MAPK Signaling                     | 7.9E-03 | ↓CXCL10, ↓MAP2K7, ↓PLA2G10, ↑MAPK9                                |
| Type 1 Diabetes Mellitus Signaling | 9.5E-03 | ↓SOCS1, ↓MAP2K7, ↑IKBK, ↓FCER1G, ↑MAPK9                           |
| IL-8 Signaling                     | 2.3E-02 | ↑IKBK, ↓ICAM1, ↓RHOG, ↓VEGFB, ↑MAPK9, ↑IRAK4                      |

The arrow ↑ indicates gene is upregulated and ↓ indicates gene is downregulated. Key: *AGPAT9*: 1-acylglycerol-3-phosphate O-acyltransferase 9; *ATP5D*: ATP synthase, H<sup>+</sup> transporting, mitochondrial F1 complex, delta subunit; *COX5B*: cytochrome c oxidase subunit Vb; *COX6B1*: cytochrome c oxidase subunit VIb polypeptide 1 (ubiquitous); *COX8A*: cytochrome c oxidase subunit VIIIA (ubiquitous); *CXCL10*: chemokine (C-X-C motif) ligand 10; *CYB5A*: cytochrome b5 type A (microsomal); *ELOVL6*: ELOVL Fatty Acid Elongase 6; *FCER1G*: Fc fragment of IgE, high affinity I, receptor for; gamma polypeptide; *GPAM*: glycerol-3-phosphate acyltransferase, mitochondrial; *ICAM1*: intercellular adhesion molecule 1, *IKBK*: inhibitor of Kappa light polypeptide gene enhancer in B-Cells, kinase gamma; *IRAK4*: interleukin-1 receptor-associated kinase 4; *MAPK9*: mitogen-activated protein kinase 9; *MAP2K7*: mitogen-activated protein kinase 7; *MT-ND2*: mitochondrially Encoded NADH Dehydrogenase 2; *NDUFA3*: NADH dehydrogenase (ubiquinone) 1 alpha subcomplex, 3, 9kDa; *PLA2G10*: phospholipase A2, group X; *RHOG*: ras homolog gene family, member G (rho G); *SOCS1*: suppressor of cytokine signaling 1; *VEGFB*: vascular endothelial growth factor B.

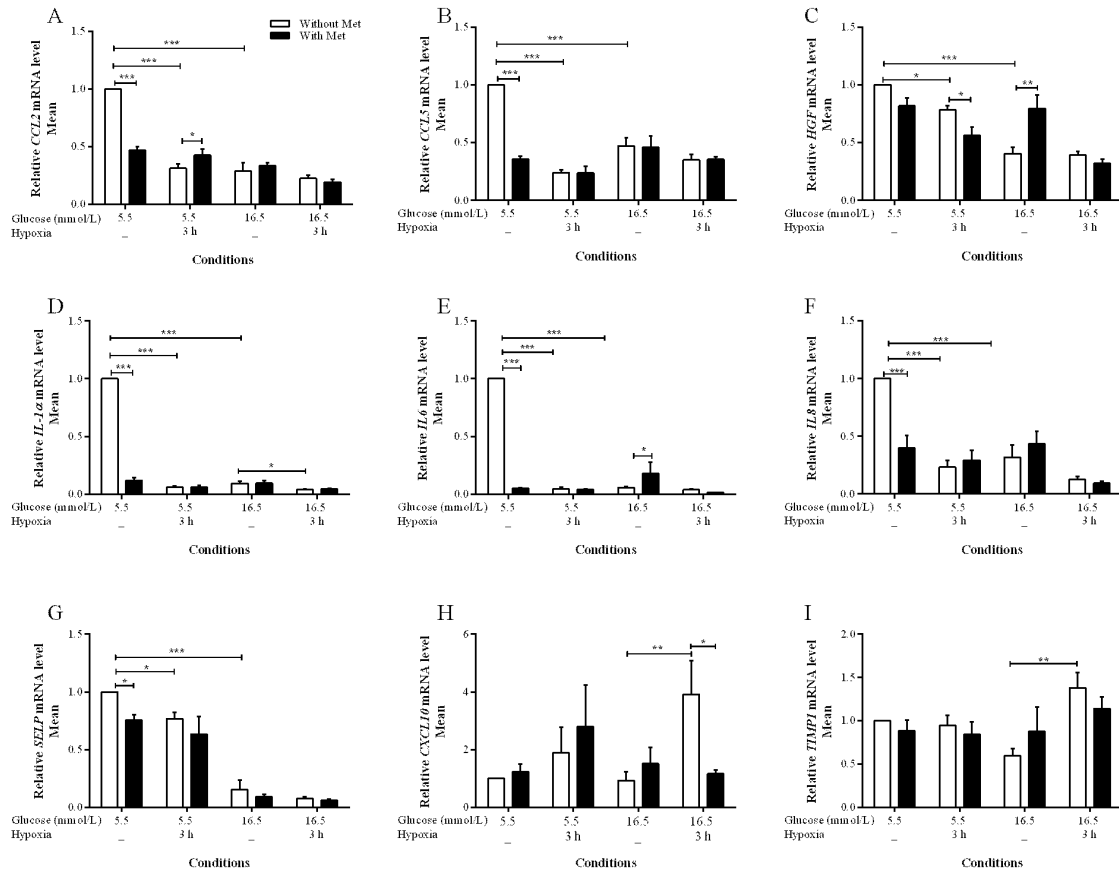

**Supplementary Figure 3: Validation of selected pro-angiogenic factors and angiogenic inhibitors in CD34<sup>+</sup> cells by qRT-PCR.** The variation in mRNA levels of (A) *CCL2*, (B) *CCL5*, (C) *HGF*, (D) *IL-1a*, (E) *IL-6*, (F) *IL-8*, (G) *SELP* (H) *CXCL10* and (I) *TIMP1* was measured by qRT-PCR (n = 3). Results are presented as  $\pm$  SEM and were statistically analysed using one-way ANOVA followed by Fisher's LSD test. Data for effects of hypoxia and hyperglycemia were compared with control (5.5 mmol/L), data for the effect of hyperglycemia-hypoxia were compared with hyperglycemia. Whereas, data for cells treated with metformin were compared with the corresponding metformin-untreated condition. \* $P < 0.05$ , \*\* $P < 0.01$ , \*\*\* $P < 0.001$ .

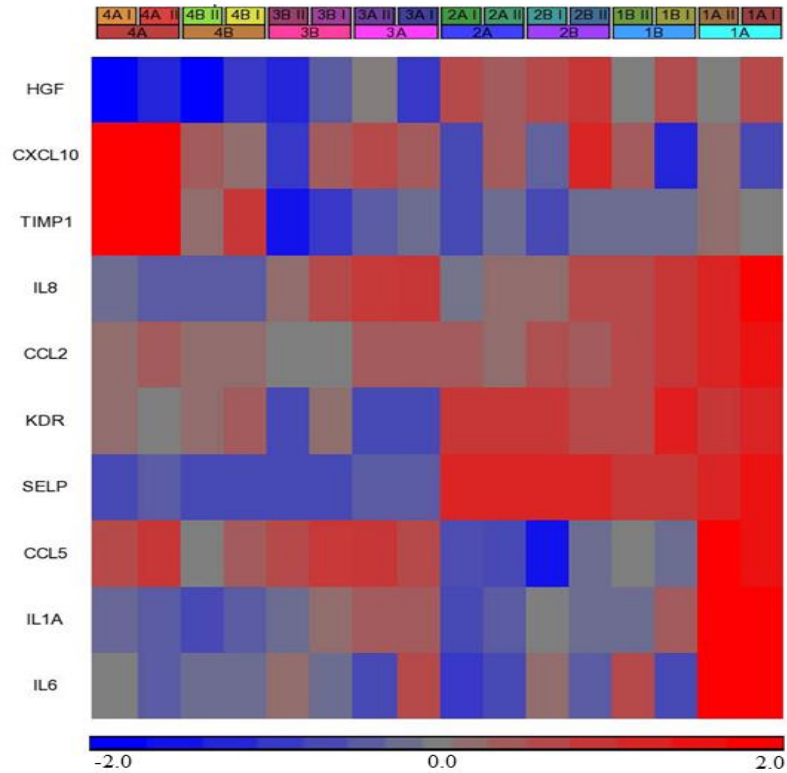

**Supplementary Figure 4: Heatmap of the pro-angiogenic and angiogenic inhibitors in CD34<sup>+</sup> stem cells.** Results were generated by transcriptomic analysis of 10 different experimental conditions each processed in two technical replicates resulting in 20 array experiments using Affymetrix microarray after exposure of CD34<sup>+</sup> cells to 4% hypoxia for 3 hours either under euglycaemia or hyperglycaemia in the presence or absence of metformin. The heatmap was generated by using Partek software. Red shading indicates upregulated genes, whereas blue shading indicates downregulated genes, and grey shading indicates non-affected genes. Key: 1A: euglycaemia, 1B: euglycaemia with metformin, 2A: euglycaemia with hypoxia, 2B: euglycaemia with hypoxia + metformin, 3A: hyperglycaemia, 3B: hyperglycaemia with metformin, 4A: hyperglycaemia with hypoxia, 4B: hyperglycaemia with hypoxia + metformin.

**Supplementary Table 7: Comparison of microarray and real-time PCR data on CD34<sup>+</sup> cells treated with hypoxia, hyperglycaemia and hyperglycaemia-hypoxia in the presence and absence of metformin.**

| Condition                      | Euglycaemia + metformin versus euglycaemia |         |         |         | Euglycaemia-hypoxia versus euglycaemia |         |         |         | Euglycaemia-hypoxia + metformin versus euglycaemia + hypoxia |         |         |         | Hyperglycaemia versus euglycaemia |         |         |         | Hyperglycaemia + metformin versus hyperglycaemia |                |            |                | Hyperglycaemia-hypoxia versus hyperglycaemia |         |         |         | Hyperglycaemia-hypoxia + metformin versus hyperglycaemia-hypoxia |                |             |                |
|--------------------------------|--------------------------------------------|---------|---------|---------|----------------------------------------|---------|---------|---------|--------------------------------------------------------------|---------|---------|---------|-----------------------------------|---------|---------|---------|--------------------------------------------------|----------------|------------|----------------|----------------------------------------------|---------|---------|---------|------------------------------------------------------------------|----------------|-------------|----------------|
|                                | Microarray                                 |         | qRT-PCR |         | Microarray                             |         | qRT-PCR |         | Microarray                                                   |         | qRT-PCR |         | Microarray                        |         | qRT-PCR |         | Microarray                                       |                | qRT-PCR    |                | Microarray                                   |         | qRT-PCR |         | Microarray                                                       |                | qRT-PCR     |                |
|                                | FC                                         | P       | FC      | P       | FC                                     | P       | FC      | P       | FC                                                           | P       | FC      | P       | FC                                | P       | FC      | P       | FC                                               | P              | FC         | P              | FC                                           | P       | FC      | P       | FC                                                               | P              | FC          | P              |
| <b>CCL2</b>                    | -1.7                                       | 3.2E-03 | -2.1    | <0.001  | -2.3                                   | 1.3E-04 | -3.2    | <0.001  | 1.2                                                          | 1.4E-01 | 1.3     | 3.7E-02 | -2.1                              | 2.5E-04 | -3.4    | <0.001  | -1.2                                             | 1.5E-01        | 1.2        | 3.6E-01        | -1.1                                         | 5.7E-01 | -1.2    | 2.3E-01 | -1.3                                                             | 6.9E-02        | -1.2        | 5.2E-01        |
| <b>CCL5</b>                    | -1.8                                       | 4.7E-04 | -2.8    | <0.001  | -2.3                                   | 3.1E-05 | -4.2    | <0.001  | 1.0                                                          | 8.2E-01 | 1.0     | 9.6E-01 | -1.5                              | 5.8E-03 | -2.1    | <0.001  | -1.0                                             | 7.6E-01        | -1.0       | 8.3E-01        | -1.0                                         | 8.4E-01 | -1.3    | 8.5E-02 | -1.2                                                             | 2.5E-01        | 1.0         | 9.4E-01        |
| <b>HGF</b>                     | -1.1                                       | 7.2E-01 | 1.2     | 8.6E-02 | 1.0                                    | 8.9E-01 | -1.3    | 4.5E-02 | -1.0                                                         | 8.9E-01 | -1.3    | 3.9E-02 | -1.3                              | 3.7E-02 | -2.5    | <0.001  | <b>-1.2</b>                                      | <b>1.5E-01</b> | <b>1.7</b> | <b>1.0E-03</b> | -1.6                                         | 2.3E-03 | 1.0     | 9.0E-01 | 1.1                                                              | 4.2E-01        | -1.3        | 4.7E-01        |
| <b>IL-1<math>\alpha</math></b> | -3.7                                       | 2.4E-05 | -8.3    | <0.001  | -4.7                                   | 5.2E-06 | -16.7   | <0.001  | 1.1                                                          | 6.5E-01 | 1.0     | 1.0E+00 | -3.8                              | 1.9E-05 | -11.1   | <0.001  | -1.2                                             | 3.1E-01        | 1.0        | 9.2E-01        | -1.5                                         | 5.0E-02 | -25.0   | 1.4E-02 | 1.1                                                              | 7.6E-01        | 1.0         | 8.7E-01        |
| <b>IL-6</b>                    | -2.2                                       | 1.7E-04 | -20.0   | <0.001  | -2.5                                   | 5.5E-05 | -20.0   | <0.001  | -1.0                                                         | 9.6E-01 | -1.1    | 9.1E-01 | -2.1                              | 2.5E-04 | -16.7   | <0.001  | <b>1.1</b>                                       | <b>7.5E-01</b> | <b>2.8</b> | <b>1.4E-02</b> | -1.1                                         | 6.2E-01 | -1.3    | 6.8E-01 | 1.0                                                              | 8.4E-01        | -2.8        | 6.1E-01        |
| <b>IL-8</b>                    | -1.6                                       | 1.1E-02 | -2.5    | <0.001  | -2.4                                   | 9.5E-05 | -4.3    | <0.001  | 1.2                                                          | 1.8E-01 | 1.2     | 5.5E-01 | -1.7                              | 4.7E-03 | -3.1    | <0.001  | -1.3                                             | 1.5E-01        | 1.3        | 2.5E-01        | -2.1                                         | 3.5E-04 | -2.4    | 6.1E-02 | -1.3                                                             | 1.4E-02        | -1.3        | 7.3E-01        |
| <b>SELP</b>                    | -1.4                                       | 4.2E-03 | -1.3    | 2.5E-02 | -1.2                                   | 1.3E-01 | -1.3    | 3.2E-02 | 1.1                                                          | 2.5E-01 | -1.1    | 2.1E-01 | -5.0                              | 3.3E-09 | -6.7    | <0.001  | -1.1                                             | 1.5E-01        | -1.1       | 5.5E-01        | -1.1                                         | 4.9E-01 | -1.3    | 4.6E-01 | 1.0                                                              | 7.5E-01        | -1.1        | 8.8E-01        |
| <b>CXCL10</b>                  | 1.1                                        | 6.4E-01 | 1.2     | 8.2E-01 | 1.2                                    | 5.4E-01 | 1.9     | 3.7E-01 | 1.4                                                          | 2.1E-01 | 1.4     | 3.7E-01 | 1.6                               | 6.9E-02 | -1.1    | 9.4E-01 | -1.4                                             | 1.7E-01        | 1.6        | 5.6E-01        | 1.9                                          | 2.0E-02 | 3.9     | 7.0E-03 | -2.0                                                             | 1.3E-02        | -3.3        | 1.1E-02        |
| <b>TIMP1</b>                   | 1.2                                        | 7.4E-02 | -1.1    | 5.7E-01 | 1.1                                    | 2.1E-01 | -1.0    | 7.9E-01 | -1.0                                                         | 7.8E-01 | -1.1    | 6.2E-01 | 1.1                               | 5.1E-01 | -1.6    | 5.6E-02 | -1.2                                             | 1.6E-01        | 1.5        | 1.7E-01        | 2.4                                          | 6.3E-06 | 1.4     | 1.0E-03 | <b>-1.7</b>                                                      | <b>3.9E-04</b> | <b>-1.3</b> | <b>2.5E-01</b> |

The highlighted data showed non-concordance in gene expression between qRT-PCR and microarray. Although hyperglycaemia and metformin resulted in an increase of mRNA levels of *HGF* and *IL-6* this remained below normal level observed at euglycaemia.
